# Supplementary material for: Insight into formation propensity of pseudocircular DNA G-hairpins
Source: Oxford University Press journal article supplement (doi:10.1093/nar/gkab029), 2021-01-13
Supplement: gkab029_supplemental_file.pdf [file gkab029_supplemental_file.pdf]

# Supporting Information

## Insight into formation propensity of pseudocircular DNA G-hairpins.

Martina Lenarčič Živković<sup>1,2,†</sup>, Martin Gajarský<sup>1,†</sup>, Kateřina Beková<sup>1,†</sup>, Petr Stadlbauer<sup>3</sup>, Lukáš Vicherek<sup>1</sup>, Magdalena Petrova<sup>4</sup>, Radovan Fiala<sup>1</sup>, Ivan Rosenberg<sup>4</sup>, Jiří Šponer<sup>1,3</sup>, Janez Plavec<sup>2,5,6,\*</sup>, and Lukáš Trantírek<sup>1,\*</sup>

<sup>1</sup> Central European Institute of Technology, Masaryk University, Brno, 62500, Czech Republic

<sup>2</sup> Slovenian NMR Centre, National Institute of Chemistry, Ljubljana, SI-1000, Slovenia

<sup>3</sup> Institute of Biophysics of CAS, v.v.i., Brno, 61265, Czech Republic

<sup>4</sup> Institute of Organic Chemistry and Biochemistry of CAS, Prague, Czech Republic

<sup>5</sup> EN-FIST Centre of Excellence, Ljubljana, SI-1001, Slovenia

<sup>6</sup> Faculty of Chemistry and Chemical Technology, University of Ljubljana, Ljubljana, SI-1000, Slovenia

\* To whom correspondence should be addressed. Tel: +420 549 49 6476; Email:

lukas.trantirek@ceitec.muni.cz

Correspondence may also be addressed to Janez Plavec. Tel: +386 1 4760 353; Email:

janez.plavec@ki.si

† These authors contributed equally.

## Table of Contents

- 1) Methods
- 2) Tables
- 3) Figures

### 1) Methods

**Scheme 1.** General procedure of synthesis of 4'-alkoxy phosphoramidite T and G monomers.(1, 2)

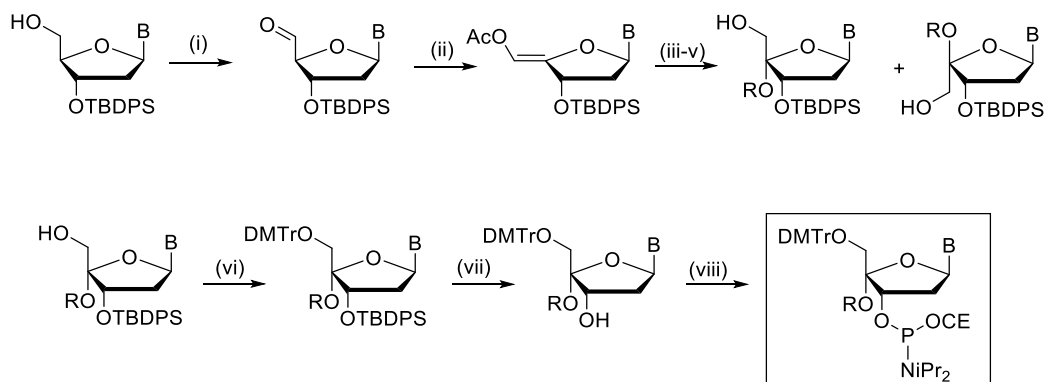

(i) DMSO, EDC, TFA, py, DMF, rt 4 h; (ii) Ac<sub>2</sub>O, K<sub>2</sub>CO<sub>3</sub>, ACN, 60 °C 4 h; (iii) NIS, ROH in DCM (1:4), -20 °C to rt 16 h; (iv) TEAB, DMF, 0 °C to rt 16 h; (v) NaBH<sub>4</sub>, MeOH, 0 °C 16 h; (vi) DMTr-Cl, py, rt 16 h; (vii) TBAF, THF, rt 16 h; (viii) CIP(OCE)NiPr<sub>2</sub>, DIPEA, THF, rt 1 h. R = CH<sub>3</sub>.

### 2) Tables

**Table S1.** Hydrogen bonds selected for the HBfix in unrestrained MD simulations of SC14.

| Construct | Base-pair                        | HBfix                              |
|-----------|----------------------------------|------------------------------------|
| SC14      | G <sup>5</sup> :G <sup>1</sup>   | N7 <sub>5</sub> -H2 <sub>1</sub>   |
|           |                                  | O6 <sub>5</sub> -H1 <sub>1</sub>   |
|           |                                  | H1 <sub>5</sub> -O6 <sub>1</sub>   |
|           |                                  | H2 <sub>5</sub> -N7 <sub>1</sub>   |
|           | G <sup>7</sup> :G <sup>-II</sup> | N7 <sub>7</sub> -H2 <sub>-II</sub> |
|           |                                  | O6 <sub>7</sub> -H1 <sub>-II</sub> |
|           |                                  | H1 <sub>7</sub> -O6 <sub>-II</sub> |
|           |                                  | H2 <sub>7</sub> -N7 <sub>-II</sub> |
|           | G <sup>6</sup> :G <sup>9</sup>   | N7 <sub>6</sub> -H2 <sub>9</sub>   |
|           |                                  | O6 <sub>6</sub> -H1 <sub>9</sub>   |
|           |                                  | H1 <sub>6</sub> -O6 <sub>9</sub>   |
|           |                                  | H2 <sub>6</sub> -N7 <sub>9</sub>   |

**Table S2.** The list of organisms used in genome-wide search for sequences with potential to form PGHs (PGH sites) for *form I (A)* and *form II (B)*.

**A**

|            | organism                          | No. PGH sites <sup>a</sup> |
|------------|-----------------------------------|----------------------------|
| viruses    | <i>Canarypox virus</i>            | 0                          |
|            | <i>Ebola virus</i>                | 0                          |
|            | <i>HIV virus</i>                  | 0                          |
|            | <i>Poliovirus</i>                 | 0                          |
|            | <i>Rubella virus</i>              | 0                          |
|            | <i>Variola virus</i>              | 0                          |
| bacteria   | <i>Staphylococcus aureus</i>      | 2                          |
|            | <i>Salmonella enterica</i>        | 4                          |
|            | <i>Klebsiella pneumoniae</i>      | 6                          |
|            | <i>Escherichia coli</i>           | 9                          |
|            | <i>Pseudomonas aeruginosa</i>     | 10                         |
|            | <i>Mycobacterium tuberculosis</i> | 28                         |
| eukaryotes | <i>Saccharomyces cerevisiae</i>   | 114                        |
|            | <i>Arabidopsis thaliana</i>       | 140                        |
|            | <i>Xenopus leavis</i>             | 7261                       |
|            | <i>Danio rerio</i>                | 7496                       |
|            | <i>Homo sapiens</i>               | 13383                      |
|            | <i>Mus musculus</i>               | 17544                      |

<sup>a</sup>Query for bioinformatic search covered eleven sequences, namely parent *form I* SC11 sequence (5'-GTGTGGGTGTG-3') and its PGH-forming analogs (*formI\_T2C*, *formI\_G3A*, *formI\_G3C*, *formI\_G3T*, *formI\_T4A*, *formI\_T4C*, *formI\_T8A*, *formI\_T8C*, *formI\_T10A*, and *formI\_T10C*).

**B**

|            | organism                          | No. PGH sites <sup>b</sup> |
|------------|-----------------------------------|----------------------------|
| viruses    | <i>Canarypox virus</i>            | 0                          |
|            | <i>Ebola virus</i>                | 0                          |
|            | <i>HIV virus</i>                  | 0                          |
|            | <i>Poliovirus</i>                 | 0                          |
|            | <i>Rubella virus</i>              | 0                          |
|            | <i>Variola virus</i>              | 0                          |
| bacteria   | <i>Staphylococcus aureus</i>      | 2                          |
|            | <i>Salmonella enterica</i>        | 0                          |
|            | <i>Klebsiella pneumoniae</i>      | 3                          |
|            | <i>Escherichia coli</i>           | 3                          |
|            | <i>Pseudomonas aeruginosa</i>     | 6                          |
|            | <i>Mycobacterium tuberculosis</i> | 10                         |
| eukaryotes | <i>Saccharomyces cerevisiae</i>   | 77                         |
|            | <i>Arabidopsis thaliana</i>       | 99                         |
|            | <i>Xenopus leavis</i>             | 7653                       |
|            | <i>Danio rerio</i>                | 18311                      |
|            | <i>Homo sapiens</i>               | 10053                      |
|            | <i>Mus musculus</i>               | 17208                      |

<sup>b</sup>Query for bioinformatics search covered seven sequences displaying PGH formation potential: 5'-GTGTGTGGGTG-3' (corresponding to the *form II* minimal sequence) and its PGH-forming analogs (*form II\_T-IC*, *form II\_G3C*, *form II\_G3A*, *form II\_G3T*, *form II\_T4A*, and *form II\_T4C*).

**Table S3.** Lifetimes (ns) of PGHs formed by SC14 during the unrestrained MD simulations<sup>a</sup>.

| <b>Construct</b>    | <i>Water model</i> |          |          |              |          |          |            |          |          |
|---------------------|--------------------|----------|----------|--------------|----------|----------|------------|----------|----------|
|                     | <i>TIP3P</i>       |          |          | <i>SPC/E</i> |          |          | <i>OPC</i> |          |          |
| <i>Simulation #</i> | <i>1</i>           | <i>2</i> | <i>3</i> | <i>1</i>     | <i>2</i> | <i>3</i> | <i>1</i>   | <i>2</i> | <i>3</i> |
| <b>SC14</b>         | 780                | 5000     | 5000     | 5000         | 520      | 5000     | 5000       | 5000     | 5000     |

<sup>a</sup>The length of the individual simulation was 5000 ns, nine independent MD simulations were performed for the SC14 construct. SC14 remained stable over the whole simulation period in seven of the simulations.

**Table S4.** List of 11-nt long oligonucleotide constructs designed based on minimal sequence forming *form I* PGH (*i.e.* SC11) bearing individual point mutations used in this study.

| name of the construct | sequence (5'→3') |
|-----------------------|------------------|
| <i>form I</i>         | GTGTGGGTGTG      |
| <i>form I_G1A</i>     | ATGTGGGTGTG      |
| <i>form I_G1C</i>     | CTGTGGGTGTG      |
| <i>form I_G1T</i>     | TTGTGGGTGTG      |
| <i>form I_T2A</i>     | GAGTGGGTGTG      |
| <i>form I_T2C</i>     | GCGTGGGTGTG      |
| <i>form I_T2G</i>     | GGGTGGGTGTG      |
| <i>form I_G3A</i>     | GTATGGGTGTG      |
| <i>form I_G3C</i>     | GTCTGGGTGTG      |
| <i>form I_G3T</i>     | GTTTGGGTGTG      |
| <i>form I_T4A</i>     | GTGAGGGTGTG      |
| <i>form I_T4C</i>     | GTGCGGGTGTG      |
| <i>form I_T4C</i>     | GTGGGGGTGTG      |
| <i>form I_G5A</i>     | GTGTAGGTGTG      |
| <i>form I_G5C</i>     | GTGTCGGTGTG      |
| <i>form I_G5T</i>     | GTGTTGGTGTG      |
| <i>form I_G6A</i>     | GTGTGAGTGTG      |
| <i>form I_G6C</i>     | GTGTGCGTGTG      |
| <i>form I_G6T</i>     | GTGTGTGTGTG      |
| <i>form I_G7A</i>     | GTGTGGATGTG      |
| <i>form I_G7C</i>     | GTGTGGCTGTG      |
| <i>form I_G7T</i>     | GTGTGGTTGTG      |
| <i>form I_T8A</i>     | GTGTGGGAGTG      |
| <i>form I_T8C</i>     | GTGTGGGCGTG      |
| <i>form I_T8G</i>     | GTGTGGGGGTG      |
| <i>form I_G9A</i>     | GTGTGGGTATG      |
| <i>form I_G9C</i>     | GTGTGGGTCTG      |
| <i>form I_G9T</i>     | GTGTGGGTTTG      |
| <i>form I_T10A</i>    | GTGTGGGTGAG      |
| <i>form I_T10C</i>    | GTGTGGGTGCG      |
| <i>form I_T10G</i>    | GTGTGGGTGGG      |
| <i>form I_G11A</i>    | GTGTGGGTGTA      |
| <i>form I_G11C</i>    | GTGTGGGTGTC      |
| <i>form I_G11T</i>    | GTGTGGGTGTT      |

**Table S5.** List of 11-nt long oligonucleotide constructs designed based on the minimal sequence forming *form II* PGH (*i.e.* SC14 lacking last three 3'-residues) bearing individual mutations used in this study.

| name of the construct | sequence (5'→3') |
|-----------------------|------------------|
| <i>form II</i>        | GTGTGTGGGTG      |
| <i>form II_G-IIA</i>  | ATGTGTGGGTG      |
| <i>form II_G-IIC</i>  | CTGTGTGGGTG      |
| <i>form II_G-IIT</i>  | TTGTGTGGGTG      |
| <i>form II_T-IA</i>   | GAGTGTGGGTG      |
| <i>form II_T-IC</i>   | GCGTGTGGGTG      |
| <i>form II_T-IG</i>   | GGGTGTGGGTG      |
| <i>form II_G1A</i>    | GTATGTGGGTG      |
| <i>form II_G1C</i>    | GTCTGTGGGTG      |
| <i>form II_G1T</i>    | GTTTGTGGGTG      |
| <i>form II_T2A</i>    | GTGAGTGGGTG      |
| <i>form II_T2C</i>    | GTGCGTGGGTG      |
| <i>form II_T2G</i>    | GTGGGTGGGTG      |
| <i>form II_G3A</i>    | GTGTATGGGTG      |
| <i>form II_G3C</i>    | GTGTCTGGGTG      |
| <i>form II_G3T</i>    | GTGTTTGGGTG      |
| <i>form II_T4A</i>    | GTGTGAGGGTG      |
| <i>form II_T4C</i>    | GTGTGCGGGTG      |
| <i>form II_T4C</i>    | GTGTGGGGGTG      |
| <i>form II_G5A</i>    | GTGTGTAGGTG      |
| <i>form II_G5C</i>    | GTGTGTCGGTG      |
| <i>form II_G5T</i>    | GTGTGTTGGTG      |
| <i>form II_G6A</i>    | GTGTGTGAGTG      |
| <i>form II_G6C</i>    | GTGTGTGCCGTG     |
| <i>form II_G6T</i>    | GTGTGTGTGTG      |
| <i>form II_G7A</i>    | GTGTGTGGATG      |
| <i>form II_G7C</i>    | GTGTGTGGCTG      |
| <i>form II_G7T</i>    | GTGTGTGGTTG      |
| <i>form II_T8A</i>    | GTGTGTGGGAG      |
| <i>form II_T8C</i>    | GTGTGTGGGCG      |
| <i>form II_T8G</i>    | GTGTGTGGGGG      |
| <i>form II_G9A</i>    | GTGTGTGGGTA      |
| <i>form II_G9C</i>    | GTGTGTGGGTC      |
| <i>form II_G9T</i>    | GTGTGTGGGTT      |

**Table S6.** Occurrences of putative PGH sites in introns of human genes for *form I (A)* and *form II (B)*.**A**

| <b>ID</b>          | <b>Sequence</b> | <b>No. of occurrences in unique genes</b> |
|--------------------|-----------------|-------------------------------------------|
| <i>form I</i>      | GTGTGGGTGTG     | 1638                                      |
| <i>form I_T2C</i>  | GCGTGGGTGTG     | 248                                       |
| <i>form I_G3A</i>  | GTATGGGTGTG     | 395                                       |
| <i>form I_G3C</i>  | GTCTGGGTGTG     | 649                                       |
| <i>form I_G3T</i>  | GTTTGGGTGTG     | 508                                       |
| <i>form I_T4A</i>  | GTGAGGGTGTG     | 696                                       |
| <i>form I_T4C</i>  | GTGCGGGTGTG     | 161                                       |
| <i>form I_T8A</i>  | GTGTGGGAGTG     | 694                                       |
| <i>form I_T8C</i>  | GTGTGGGCGTG     | 233                                       |
| <i>form I_T10A</i> | GTGTGGGTGAG     | 684                                       |
| <i>form I_T10C</i> | GTGTGGGTGCG     | 161                                       |

**B**

| <b>ID</b>           | <b>Sequence</b> | <b>No. of occurrences in unique genes</b> |
|---------------------|-----------------|-------------------------------------------|
| <i>form II</i>      | GTGTGTGGGTG     | 1554                                      |
| <i>form II_T-IC</i> | GCGTGTGGGTG     | 245                                       |
| <i>form II_G3A</i>  | GTGTATGGGTG     | 388                                       |
| <i>form II_G3C</i>  | GTGTCTGGGTG     | 638                                       |
| <i>form II_G3T</i>  | GTGTTTGGGTG     | 533                                       |
| <i>form II_T4A</i>  | GTGTGAGGGTG     | 587                                       |
| <i>form II_T4C</i>  | GTGTGCGGGTG     | 170                                       |

1) Figures

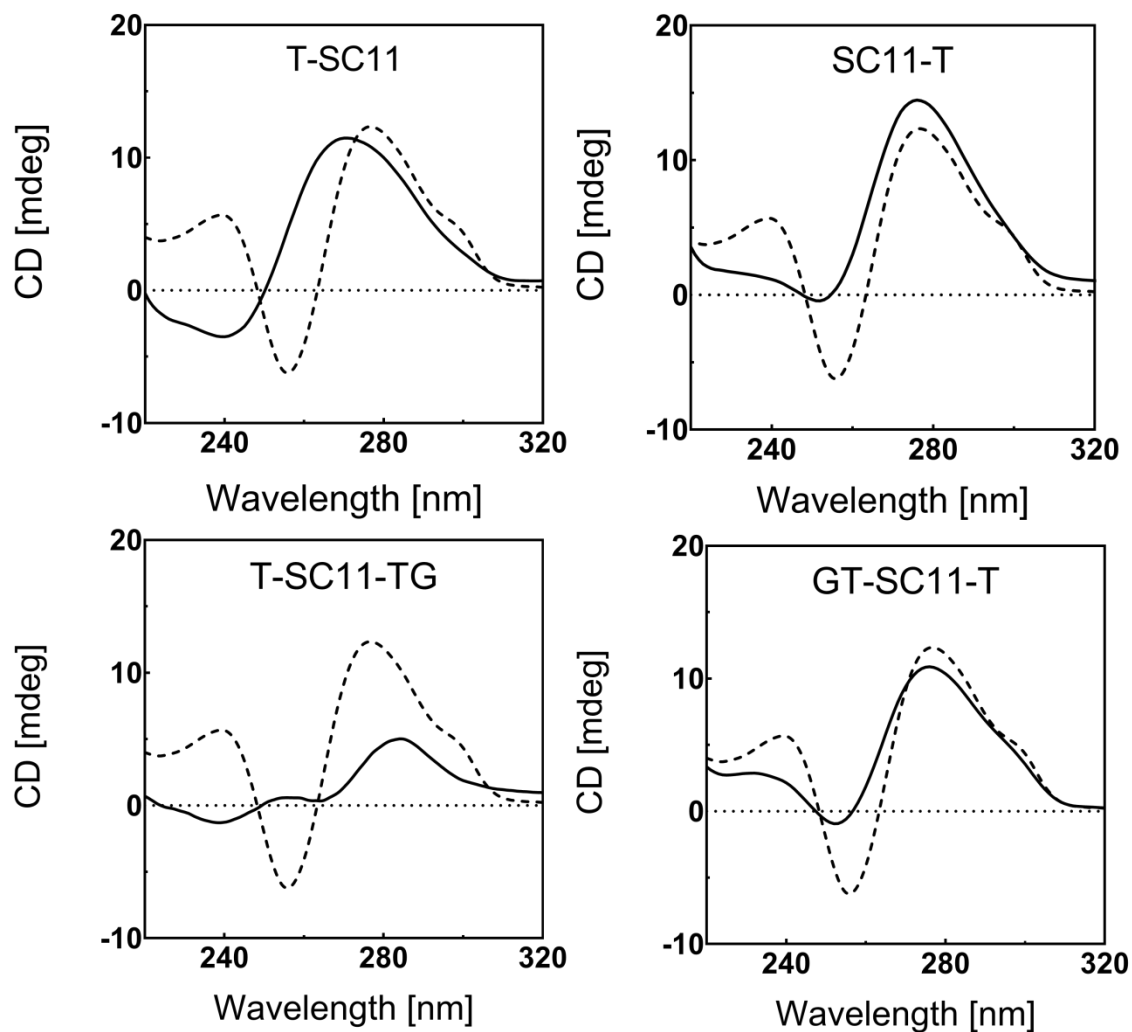

**Figure S1.** CD spectra of the parent SC11 (dashed line) and extended sequences based on SC11 (solid line) (cf. Figure 2).



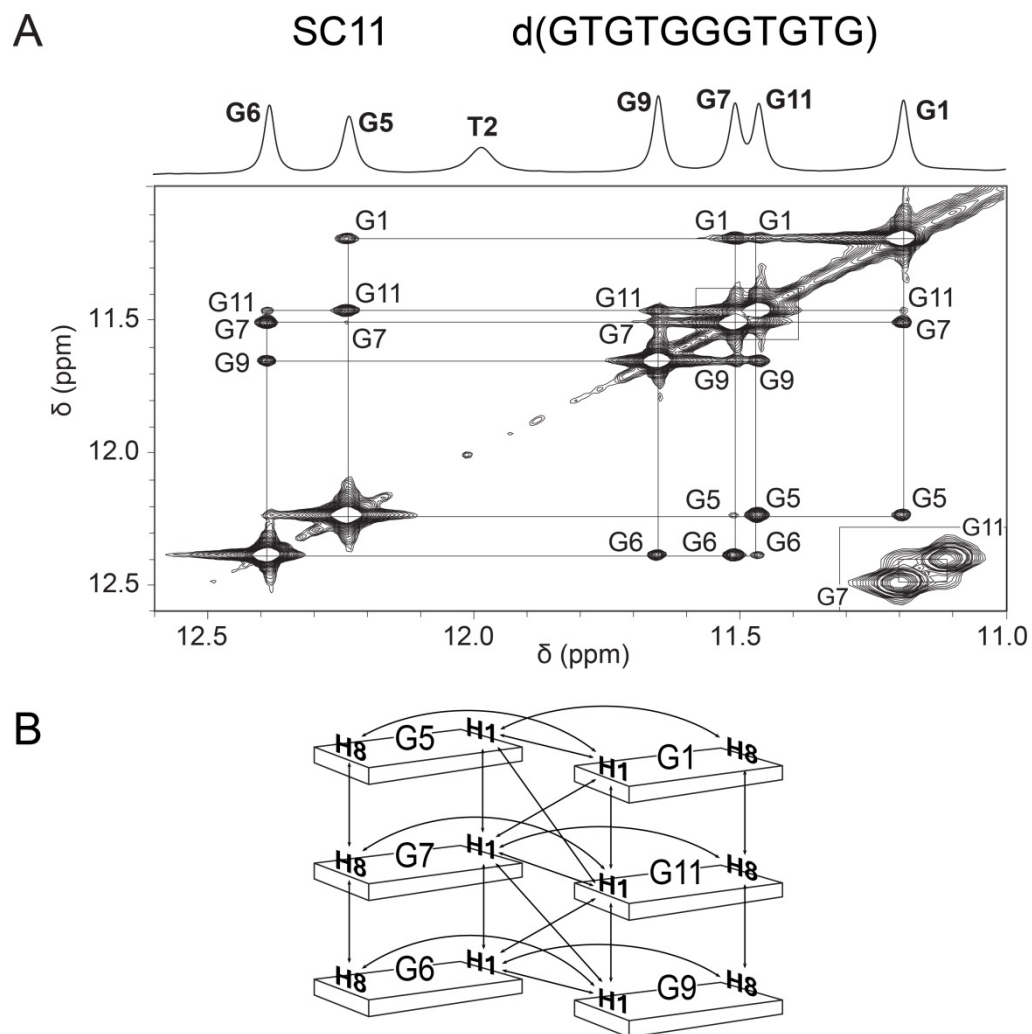

**Figure S2. (A)** Top: The sequence and assigned imino region of the 1D  $^1\text{H}$  NMR spectrum of SC11. Bottom: The imino-imino region of 2D NOESY spectrum ( $\tau_m = 150$  ms) in  $^1\text{H}_2\text{O}/^2\text{H}_2\text{O}$  (90:10). **(B)** Schematic representation of NOE connectivities (indicated by arrows) between imino and aromatic protons for core guanine residues observed in the NOESY spectrum of SC11. Figure S2 was adapted from (3).

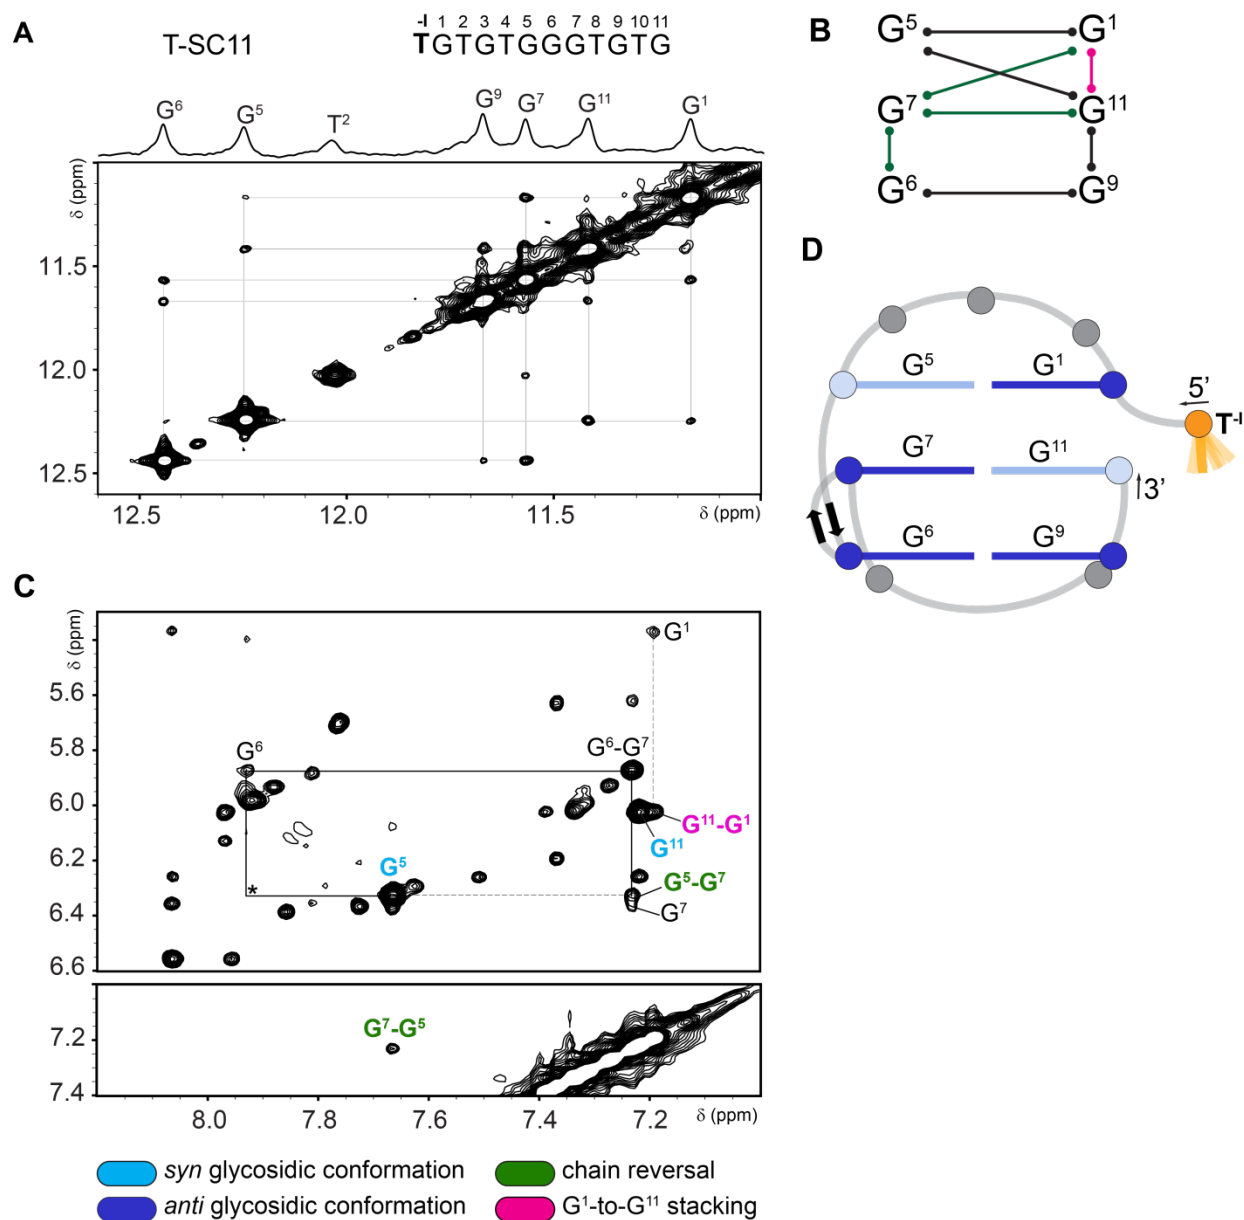

**Figure S3.** (A) T-SC11 sequence with the corresponding imino region of 1D <sup>1</sup>H NMR spectrum (top) and imino-imino region of 2D NOESY spectrum ( $\tau_m = 150$  ms) (bottom). (B) Schematic presentation of imino-imino NOE connectivities of T-SC11 observed in the NOESY spectrum. (C) Anomeric-aromatic (top) and aromatic-aromatic (bottom) regions of the 2D NOESY spectrum ( $\tau_m = 150$  ms) of T-SC11. NOE connectivities characteristic of chain reversal involving residues G<sup>5</sup>, G<sup>6</sup>, and G<sup>7</sup> (dark green) and G<sup>1</sup>-to-G<sup>11</sup> stacking (magenta) are highlighted. Residues G<sup>5</sup> and G<sup>11</sup> that occupy *syn* glycosidic conformations are colored light blue. (D) Schematic of PGH topology adopted by T-SC11 as deduced from the NOE data.

**Commentary/Notes:**

All the main structural elements characteristic for a PGH fold are preserved in T-SC11: three G:G base pair core, chain reversal and stacking of G<sup>1</sup> and G<sup>11</sup>. Complex network of imino-imino NOE connectivities indicates that the core of the structure involves guanines G<sup>1</sup>, G<sup>5</sup>, G<sup>6</sup>, G<sup>7</sup>, G<sup>9</sup>, and G<sup>11</sup> that form G<sup>5</sup>:G<sup>1</sup>, G<sup>7</sup>:G<sup>11</sup> and G<sup>6</sup>:G<sup>9</sup> base pairs (Figure S3A and S3B). Although, no G<sup>5</sup>-G<sup>7</sup> and G<sup>6</sup>-G<sup>11</sup> imino-imino NOE contacts were observed, the position of G<sup>7</sup> between G<sup>5</sup> and G<sup>6</sup> is evidenced mainly by the presence of G<sup>1</sup>-G<sup>7</sup> H1-H1, G<sup>5</sup>-G<sup>7</sup> H1'-H8 and G<sup>7</sup>-G<sup>5</sup> H8-H8 NOE connectivities (Figure S3A and S3C). G<sup>1</sup>-to-G<sup>11</sup> stacking is supported by the observation of G<sup>11</sup>-G<sup>1</sup> (weak) H1-H1 and H1'-H8 NOE contacts (Figure S3C). H8-H8 NOE cross-peak between G<sup>1</sup> and G<sup>11</sup> could not be observed due to similar chemical shifts of their aromatic protons. Intense intraresidual NOE cross-peaks in the anomeric-aromatic region of the NOESY spectrum (Figure S3C) indicate *syn* glycosidic conformations for G<sup>5</sup> and G<sup>11</sup>, which corresponds to *syn* guanines at the equivalent positions as in parent SC11 structure. The lack of NOE connectivities between 5'-end residue T<sup>1</sup> and other residues indicates that 5'-T<sup>1</sup> is, in contrast to well-defined PGH unit, disordered (Figure S3D).

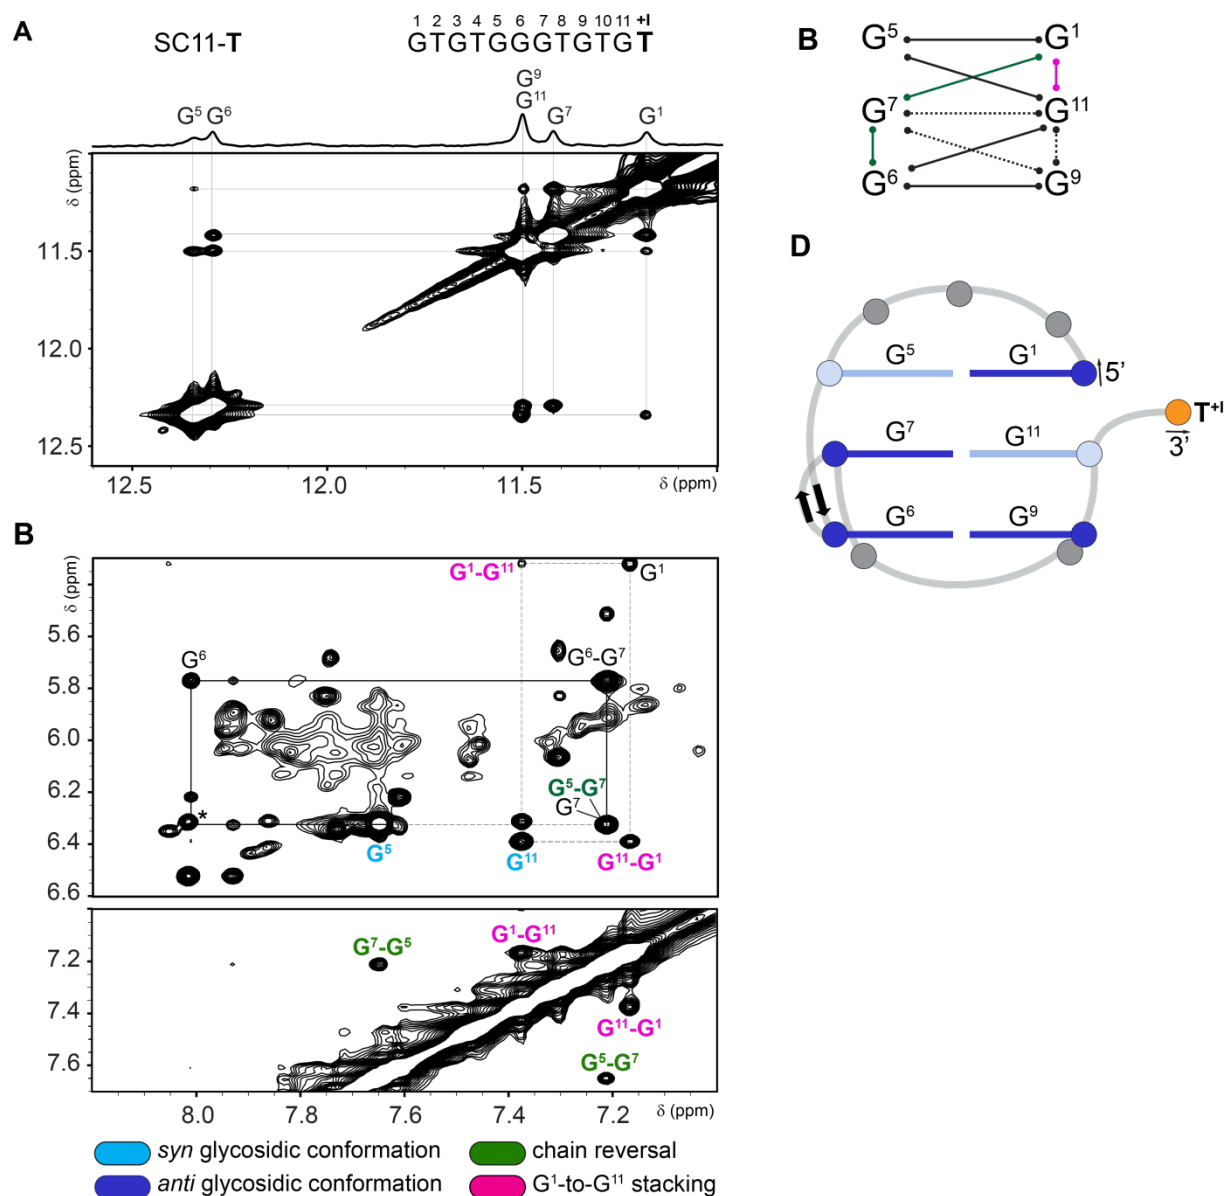

**Figure S4.** (A) SC11-T sequence with the corresponding imino region of 1D <sup>1</sup>H NMR spectrum (top) and imino-imino region of 2D NOESY spectrum ( $\tau_m = 150$  ms) (bottom). (B) Schematic presentation of imino-imino NOE connectivities of SC11-T observed in the NOESY spectrum. (C) Anomeric-aromatic (top) and aromatic-aromatic (bottom) regions of the 2D NOESY spectrum ( $\tau_m = 150$  ms) of SC11-T. NOE connectivities characteristic of chain reversal involving residues G<sup>5</sup>, G<sup>6</sup>, and G<sup>7</sup> (dark green) and G<sup>1</sup>-to-G<sup>11</sup> stacking (magenta) are highlighted. Residues G<sup>5</sup> and G<sup>11</sup> that occupy *syn* glycosidic conformations are colored light blue. (D) Schematic of PGH topology adopted by SC11-T as deduced from NOE data.

### Commentary/Notes:

All the main structural elements characteristic for a PGH fold are preserved in SC11-T: three G:G base pair core, chain reversal and stacking of G<sup>1</sup> and G<sup>11</sup>. Complex network of imino-imino NOE connectivities indicates that the core of the structure involves guanines G<sup>1</sup>, G<sup>5</sup>, G<sup>6</sup>, G<sup>7</sup>, G<sup>9</sup>, and G<sup>11</sup> that form G<sup>5</sup>:G<sup>1</sup>, G<sup>7</sup>:G<sup>11</sup> and G<sup>6</sup>:G<sup>9</sup> base pairs (Figure S4A and S4B). Although, no G<sup>5</sup>-G<sup>7</sup> imino-imino NOE contacts was observed, the position of G<sup>7</sup> between G<sup>5</sup> and G<sup>6</sup> is evidenced mainly by the presence of G<sup>1</sup>-G<sup>7</sup> H1-H1, G<sup>5</sup>-G<sup>7</sup> H1'-H8 and H8-H8 NOE connectivities (Figure S4A and S4C). G<sup>1</sup>-to-G<sup>11</sup> stacking is supported by the observation of G<sup>11</sup>-G<sup>1</sup> H1-H1, H8-H8 and H1'-H8 NOE contacts (Figure S4C). Intense intraresidual NOE cross-peaks in the anomeric-aromatic region of the NOESY spectrum (Figure S4C) indicate *syn* glycosidic conformations for G<sup>5</sup> and G<sup>11</sup>, which corresponds to *syn* guanines at the equivalent positions as in parent SC11 structure.

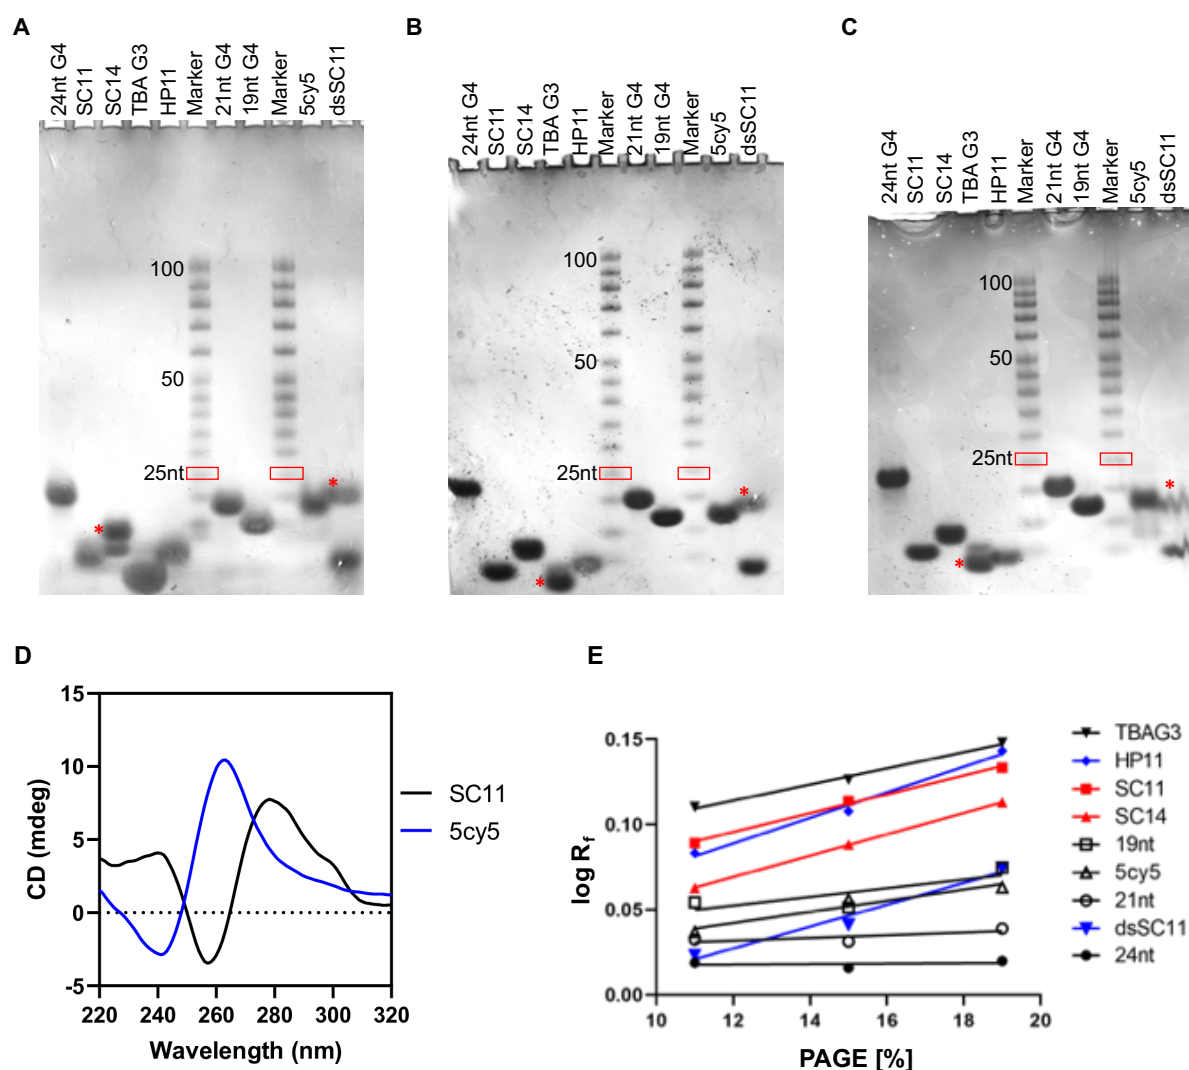

**Figure S5.** Native polyacrylamide gel electrophoresis (PAGE) run in 10mM KPOi and 100 mM KCl, pH=7 at 6°C. The acrylamide concentration in the gel was set to 11 (A), 15 (B), and 19% (C), respectively. The 24nt, 21nt, and 19nt G4 correspond to the monomolecular G-quadruplexes formed by d[TT(GGGTTA)<sub>3</sub>GGGA] (4), d(GTAGGTGGTTGGTGTGGTTGG) (5), and d(GGTTTGGTTGTTGGTTTGG) (5), respectively. The HP11 and dsSC11 corresponds to the extended ultra-stable mini-hairpin d(CGGCGAAGCCG) (6) and heteroduplex d(GTGTGGGTGTG).d(CACACCCACAC), respectively. The TBAG3 corresponds to the 11-nt d(GGTTGGTGTGG) forming a monomeric G-triplex structure (7,8). Note: TBAG3 has an identical nucleotide composition as SC11. The 5cy5 corresponds to the covalently tagged SC11 with a conventional fluorescence probe (cy5) (Sigma-Aldrich, USA). Note: The attachment of cy5 to the 5'-terminus of SC11 sequence was noted to remodel its conformational behavior as evidenced from the comparison of SC11 and 5cy5 CD spectra. While the CD spectrum of SC11 shows pattern typical for PGH, the CD spectrum of 5cy5 (see panel D) displays characteristic shape for a parallel G-quadruplex. The "\*" marks the bands employed for the construction of the Ferguson plot (cf. panel E). The individual bands of the "Marker" corresponds (from the top) to 100, 90, 80, 70, 60, 50, 45, 40, 35, 30, 25, 20, 15, and 10nt. E) The (Ferguson) plot: The logarithm of relative mobility (with respect to the 25 nt band from the marker - red box in panels A, B, and C is plotted against the concentration of the polyacrylamide gel.

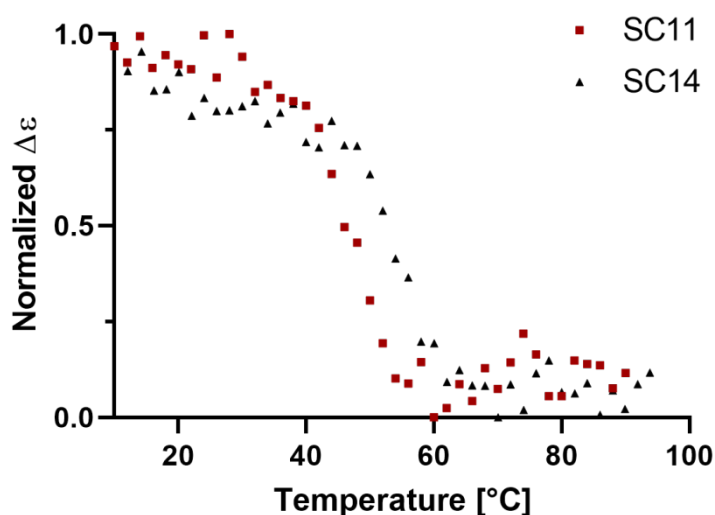

**Figure S6.** CD melting curves of SC11 and SC14 recorded at 272 nm in 10mM KPOi + 100 mM KCl, pH= 7.

**A**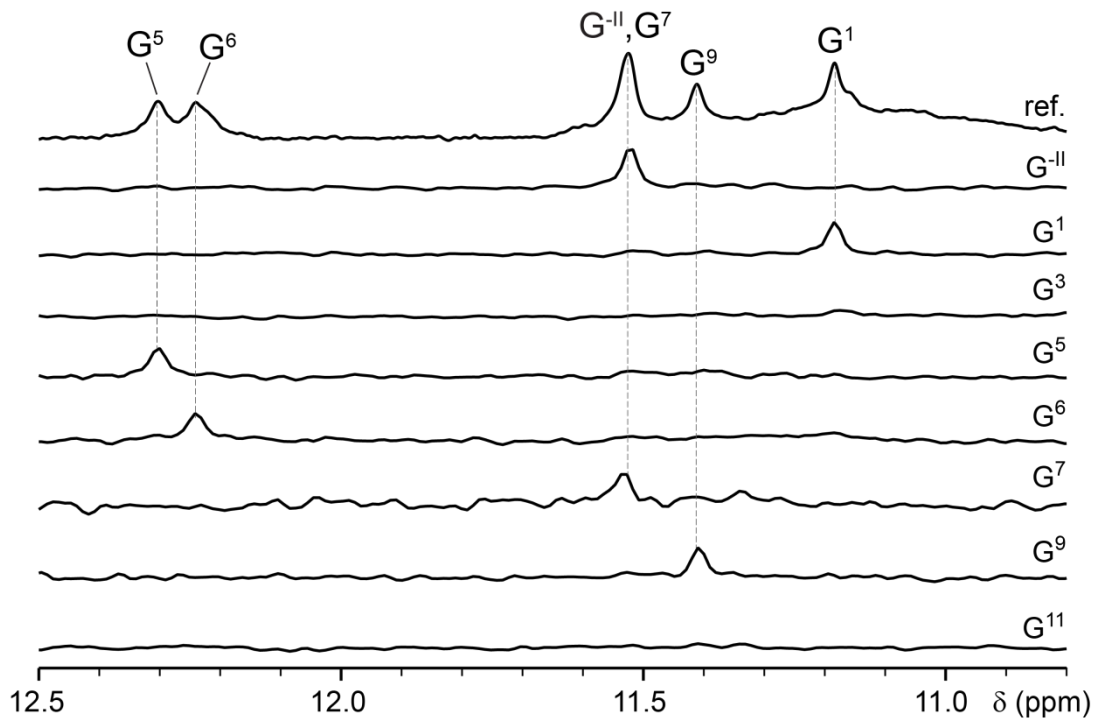**B**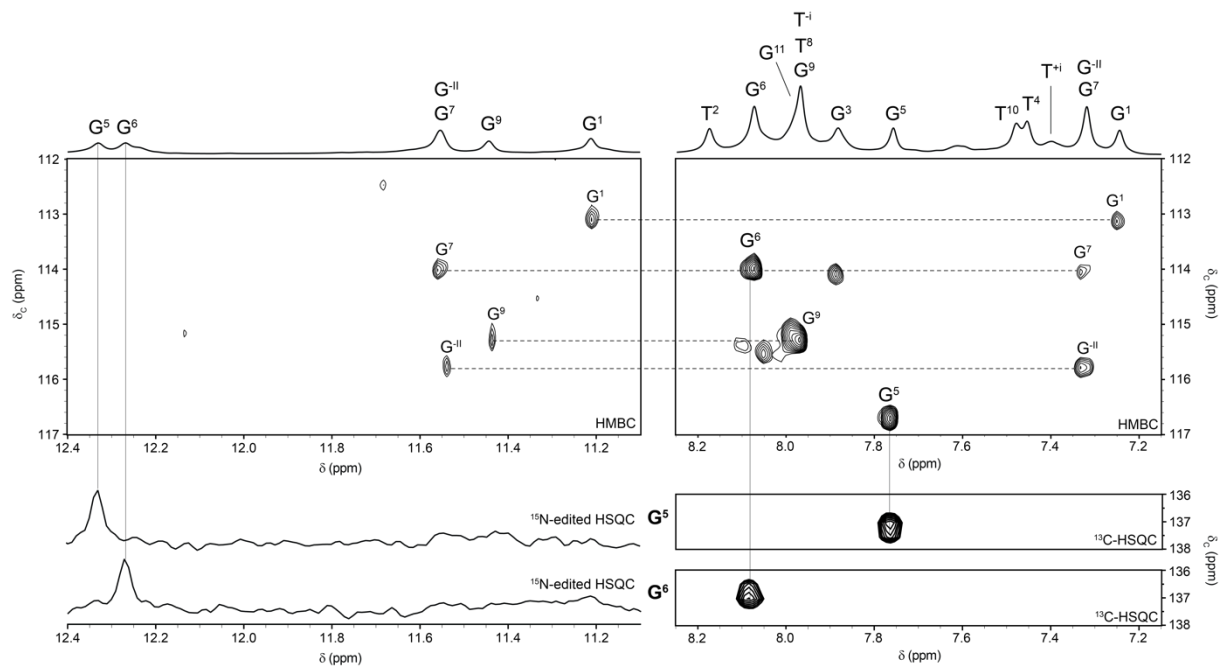

**Figure S7. (A)** Unambiguous assignment of imino proton resonances of SC14 was achieved by recording  $^{15}\text{N}$ -edited HSQC spectra on partially (~6%) residue-specific  $^{15}\text{N}/^{13}\text{C}$ -labeled oligonucleotides. **(B)** Unambiguous assignment of aromatic (H8) proton resonances of G:G core-forming residues ( $\text{G}^{\text{II}}$ ,  $\text{G}^1$ ,  $\text{G}^7$ , and  $\text{G}^9$ ) of SC14 was achieved by recording of 2D  $^1\text{H}$ - $^{13}\text{C}$  JR-HMBC spectrum at natural abundance of  $^{13}\text{C}$ : Top-left and top-right panels display aromatic ( $^{13}\text{C}$ )-imino( $^1\text{H}$ ) and aromatic ( $^{13}\text{C}$ )-aromatic( $^1\text{H}$ ) regions of JR-HMBC spectrum, respectively. Unambiguous assignment of aromatic (H8) proton resonances of G:G core forming residues ( $\text{G}^5$  and  $\text{G}^6$ ) of SC14 was achieved by recording  $^{15}\text{N}$ -edited (bottom-left) and  $^{13}\text{C}$ - (bottom-right) HSQC spectra on partially (~50%) residue specific  $^{15}\text{N}/^{13}\text{C}$ -labeled  $\text{G}^5$  and  $\text{G}^6$  oligonucleotides. Imino and aromatic regions of 1D  $^1\text{H}$  NMR spectrum of SC14 (GT-SC11-T) and assignment of corresponding resonances are shown on top. Spectra were recorded on Agilent DD2 600 MHz spectrometer at  $10^\circ\text{C}$  in 90%  $\text{H}_2\text{O}$ , 10%  $^2\text{H}_2\text{O}$ , 100 mM KCl, 10 mM phosphate buffer with pH 7.0. Oligonucleotide concentrations were 0.5 mM.



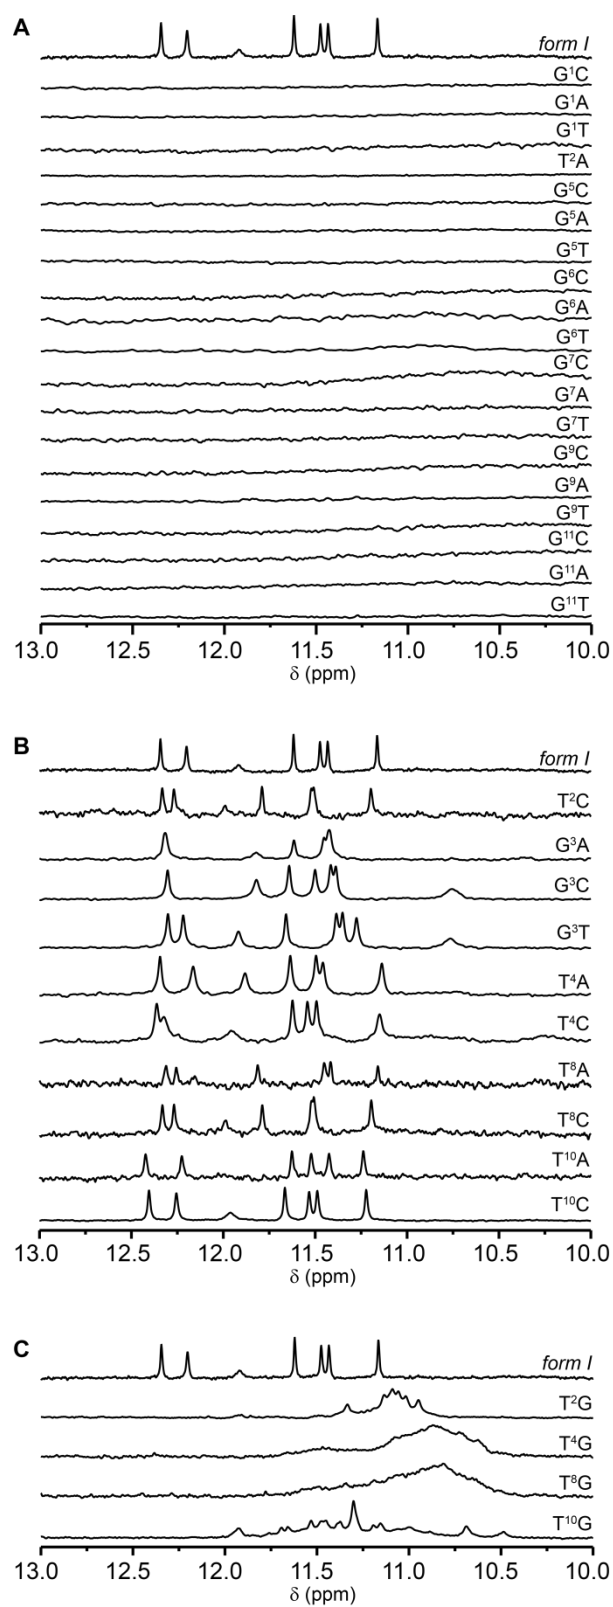

**Figure S8.** Imino regions of 1D <sup>1</sup>H NMR spectra of parent *form I* sequence (top) and its single-point mutations that prevent formation of a stable structure (**A**), form PGH-like structures (**B**), and lead to formation of G-quadruplex structures (**C**).

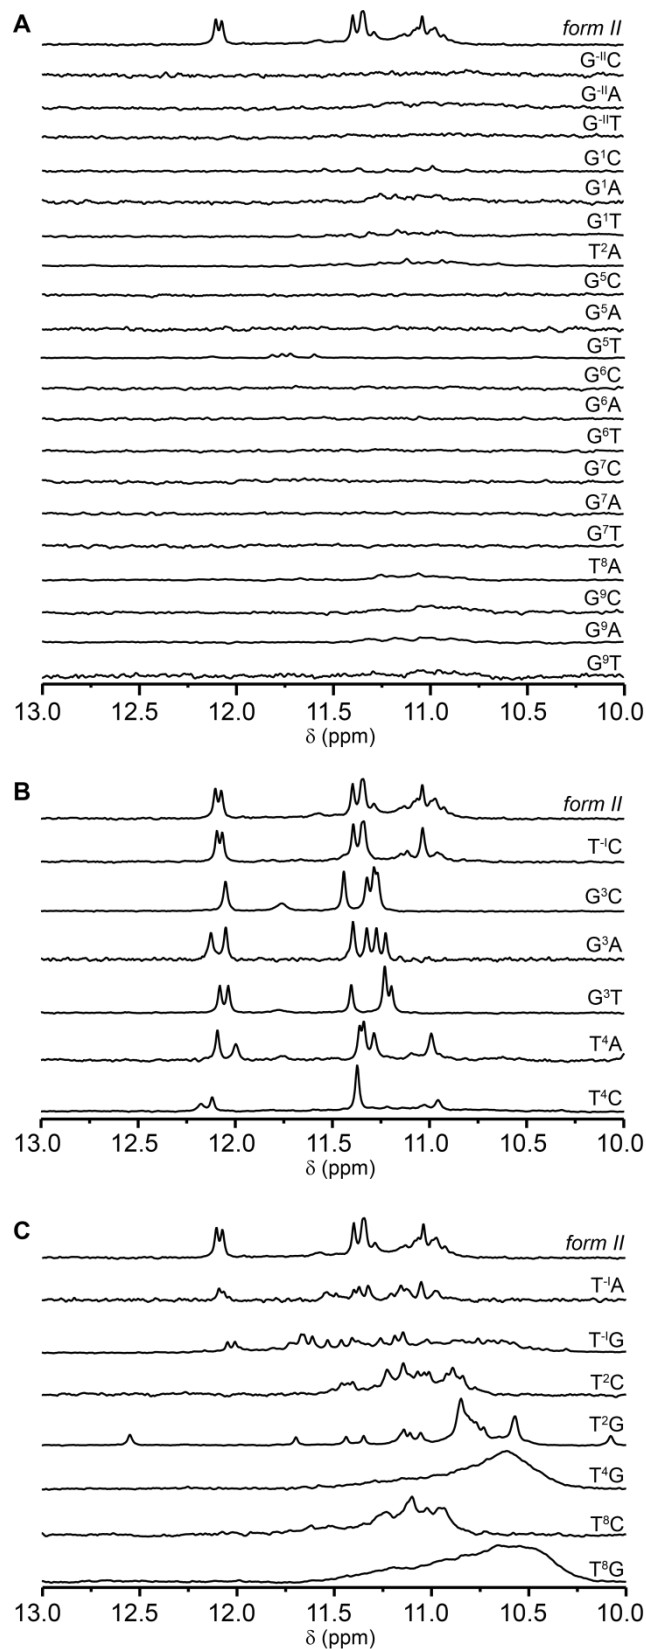

**Figure S9.** Imino regions of 1D <sup>1</sup>H NMR spectra of minimal *form II* sequence (top) and its single-point mutations that prevent formation of a stable structure (**A**), form PGH-like structures (**B**), and lead to formation of G-quadruplex structures (**C**).

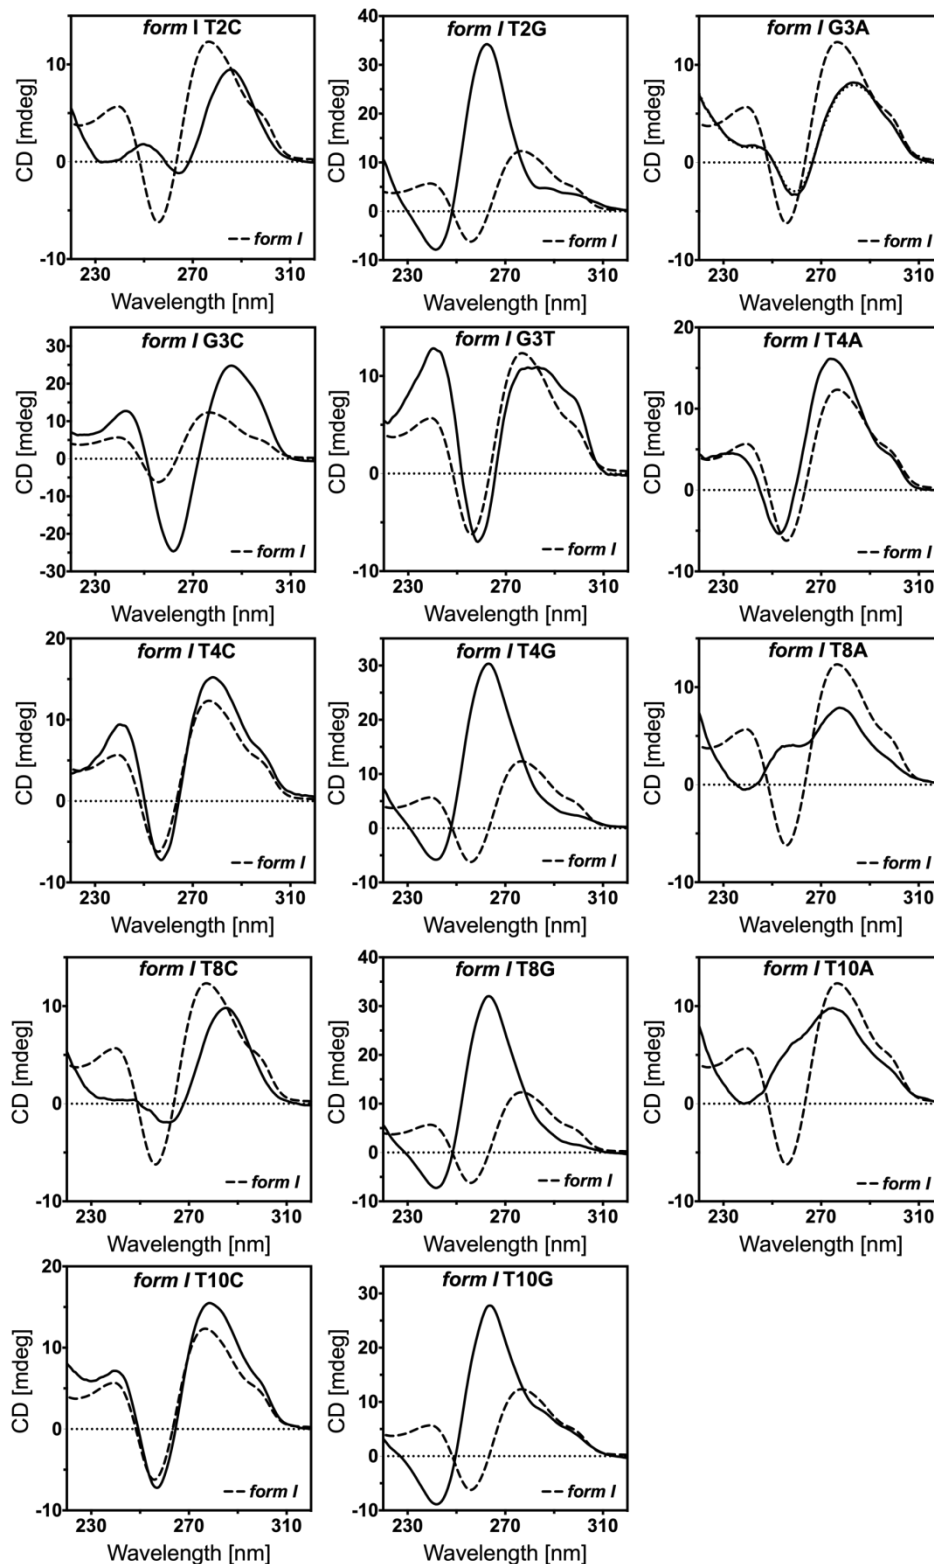

**Figure S10.** CD spectra of the parent *form I* sequence (dashed line) and selected single-point mutant variants (solid line). Please note that CD spectra of T2G, T4G, T8G, and T10G constructs display a typical shape of parallel G-quadruplex structure.

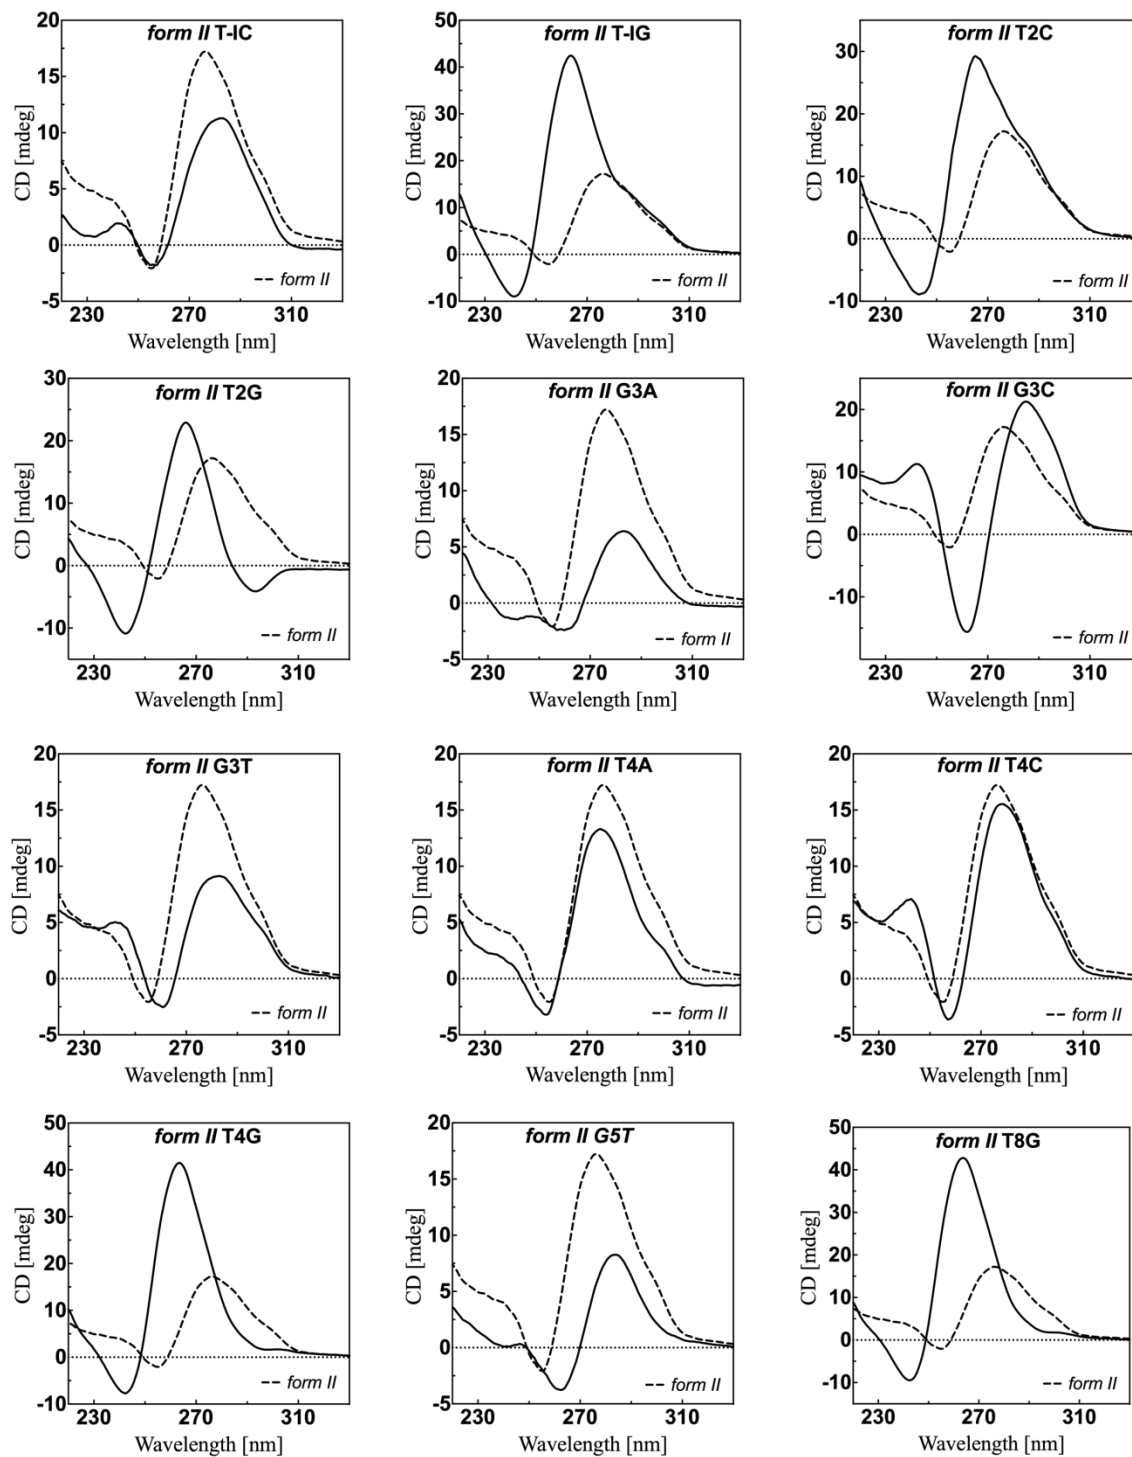

**Figure S11.** CD spectra of the minimal *form II* sequence (dashed line) and selected single-point mutant variants (solid line). Please note that CD spectra of T2G, T4G, T8G, and T10G constructs display a typical shape of parallel G-quadruplex structure.

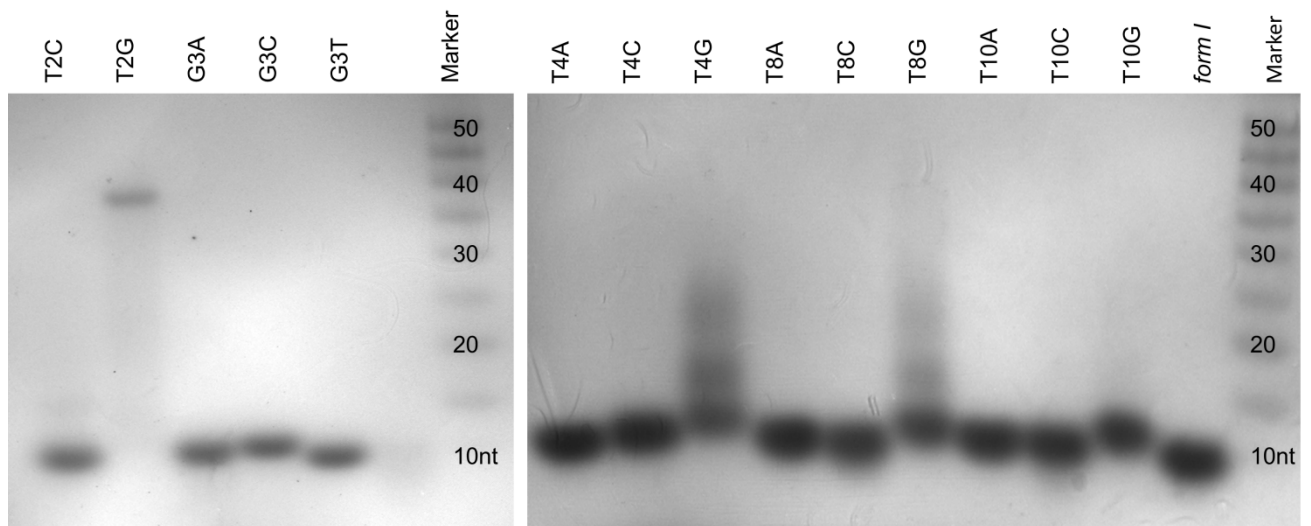

**Figure S12.** Native PAGE of the parent *form I* sequence and its single-point mutant variants that form stable secondary structures (cf. Figure S6 and S8).

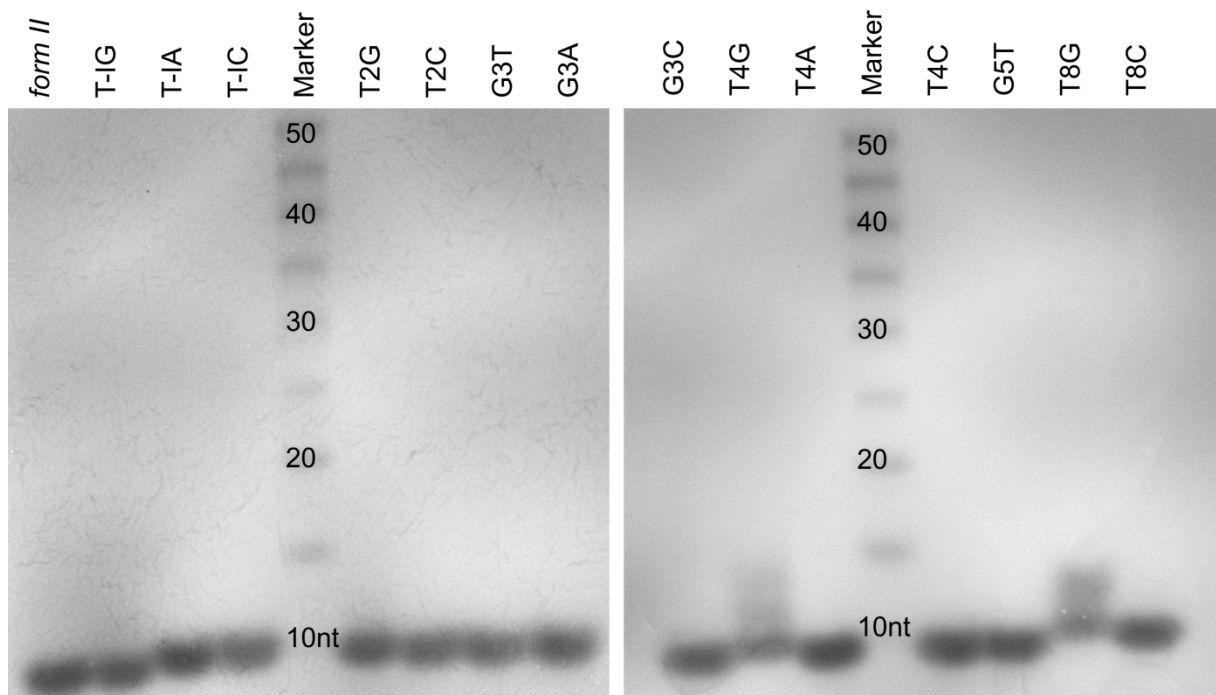

**Figure S13.** Native PAGE of the parent *form II* sequence and its single-point mutant variants that form stable secondary structures (cf. Figure S7 and S9).

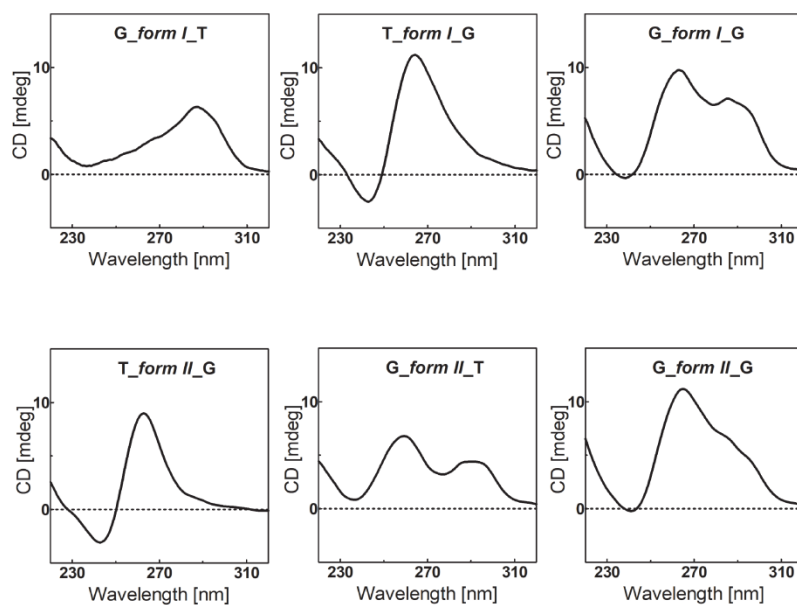

**Figure S14.** CD spectra of selected extended minimal constructs for *form I* and *form II*.

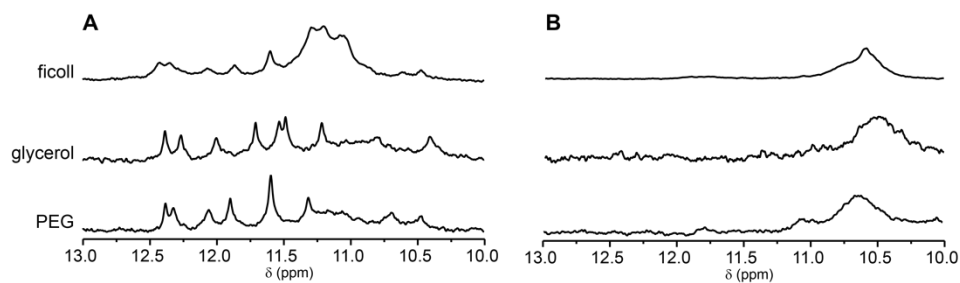

**Figure S15.** Imino regions of 1D  $^1\text{H}$  NMR spectra of SC11 (**A**) and SC14 (**B**) acquired at 10 °C in the potassium based buffer (10 mM KPOi + 100 mM KCl, pH=7) supplemented with 20% w/v of Ficoll 70, PEG200, or glycerol.

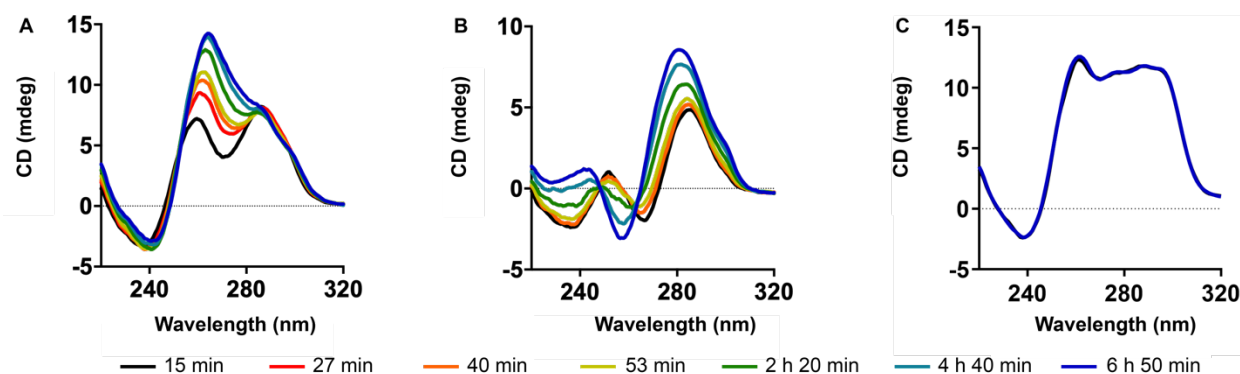

**Figure S16.** (A) and (B) CD spectra of SC11 acquired at 20 °C and 1 °C as a function of the time after annealing and quenching on ice in potassium phosphate based buffer (10 mM  $\text{KPO}_i$ , pH=7, 100 mM KCl), respectively. (C) CD spectra of SC11 acquired at 1 °C as a function of the time after annealing and quenching on ice in the sodium phosphate based buffer (10 mM  $\text{NaPO}_i$ , pH=7, 100 mM NaCl).

## References

1. Liboska,R., Snášel,J., Barvík,I., Buděšínský,M., Pohl,R., Točík,Z., Páv,O., Rejman,D., Novák,P. and Rosenberg,I. (2011) 4'-Alkoxy oligodeoxynucleotides: a novel class of RNA mimics. *Org. Biomol. Chem.*, **9**, 8261–8267.
2. Petrová,M., Páv,O., Buděšínský,M., Zborníková,E., Novák,P., Rosenbergová,Š., Pačes,O., Liboska,R., Dvořáková,I., Šimák,O., et al. (2015) Straightforward Synthesis of Purine 4'-Alkoxy-2'-deoxynucleosides: First Report of Mixed Purine–Pyrimidine 4'-Alkoxyoligodeoxynucleotides as New RNA Mimics. *Org. Lett.*, **17**, 3426–3429.
3. Gajarský,M., Živković,M.L., Stadlbauer,P., Pagano,B., Fiala,R., Amato,J., Tomáška,L., Šponer,J., Plavec,J. and Trantírek,L. (2017) Structure of a Stable G-Hairpin. *J. Am. Chem. Soc.*, **139**, 3591–3594.
4. Ngoc Luu K., Phan A.-T., Kuryavyi V., Lacroix L, Patel D.J. (2006) Structure of the Human Telomere in  $\text{K}^+$  Solution: An Intramolecular (3 + 1) G-Quadruplex Scaffold *J. Am. Chem. Soc.* 128, 30, 9963–9970
5. Fialova M., Kypr J., Vorlickova M. (2006) The thrombin binding aptamer GGTGGTGGTGGTGG forms a bimolecular guanine tetraplex. *Biochem Biophys Res Commun.* 344(1):50-4.
6. Padrta P., Stefl R., Králík L., Zídek L., Sklenar V. (2002) Refinement of d(GCGAAGC) hairpin structure using one- and two-bond residual dipolar couplings. *J Biomol NMR.* 24(1):1-14.

7. Cerofolini L., Amato J., Giachetti A., Limongelli V., Novellino E., Parrinello M., Fragai M., Randazzo A., Luchinat C. (2014) G-triplex structure and formation propensity. *Nucleic Acids Res.* 42(21):13393-404.
8. Limongelli V., De Tito S., Cerofolini L., Fragai M., Pagano B., Trotta R., Cosconati S., Marinelli L., Novellino E., Bertini I., Randazzo A., Luchinat C., Parrinello M. (2013) The G-triplex DNA. *Angew Chem Int Ed Engl.* 52(8):2269-73.
